# Supplementary material for: Bioorganometallic derivatives of 4-hydrazino-benzenesulphonamide as carbonic anhydrase inhibitors: synthesis, characterisation and biological evaluation
Source: PubMed Central journal article supplement (PMC7034112; doi:10.1080/14756366.2020.1724995), 2020-02-10

## SUPPORTING INFORMATION FOR

### **Bioorganometallic derivatives of 4-hydrazino-benzenesulfonamide as carbonic anhydrase inhibitors: Synthesis, characterization and biological evaluation**

Jeremie Brichet <sup>a</sup>, Rodrigo Arancibia <sup>a,\*</sup>, Emanuela Berrino <sup>b</sup>, Claudiu T. Supuran <sup>b,\*</sup>

<sup>a</sup> Laboratorio de Química Inorgánica y Organometálica, Departamento de Química Analítica e Inorgánica, Facultad de Ciencias Químicas, Universidad de Concepción, Concepción, Chile.

<sup>b</sup> Dipartimento Neurofarba, Sezione di Scienze Farmaceutiche, Università degli Studi di Firenze, Firenze, Italy.

---

\*Corresponding authors: E-mail: [rarancibia@udec.cl](mailto:rarancibia@udec.cl) (Rodrigo Arancibia); E-mail: [claudiu.supuran@unifi.it](mailto:claudiu.supuran@unifi.it); Tel/Fax: +39-055-4573729 (Claudiu T. Supuran)

*Supporting information contents:*

## 1.- Supplementary Figures

**Figure S1.** Electron impact mass spectrum of **1a**.

**Figure S2.** FT-IR spectrum (KBr disk) of **3b**.

**Figure S3.** FT-IR spectrum (KBr disk) of **1a**.

**Figure S3.** [ $^1\text{H}$ - $^{13}\text{C}$ ]-HSQC spectrum of ligand **2a** in acetone- $\text{d}_6$  at 298 K.

**Figure S1.** Electron impact mass spectrum of **1a**.

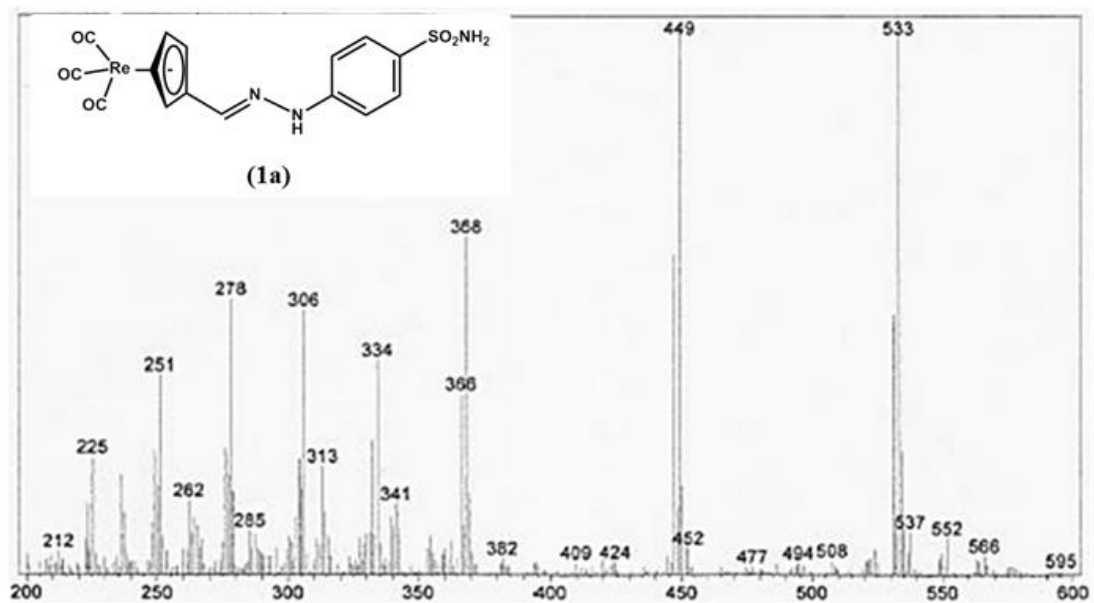

Figure S2. FT-IR spectrum (KBr disk) of **3b**.

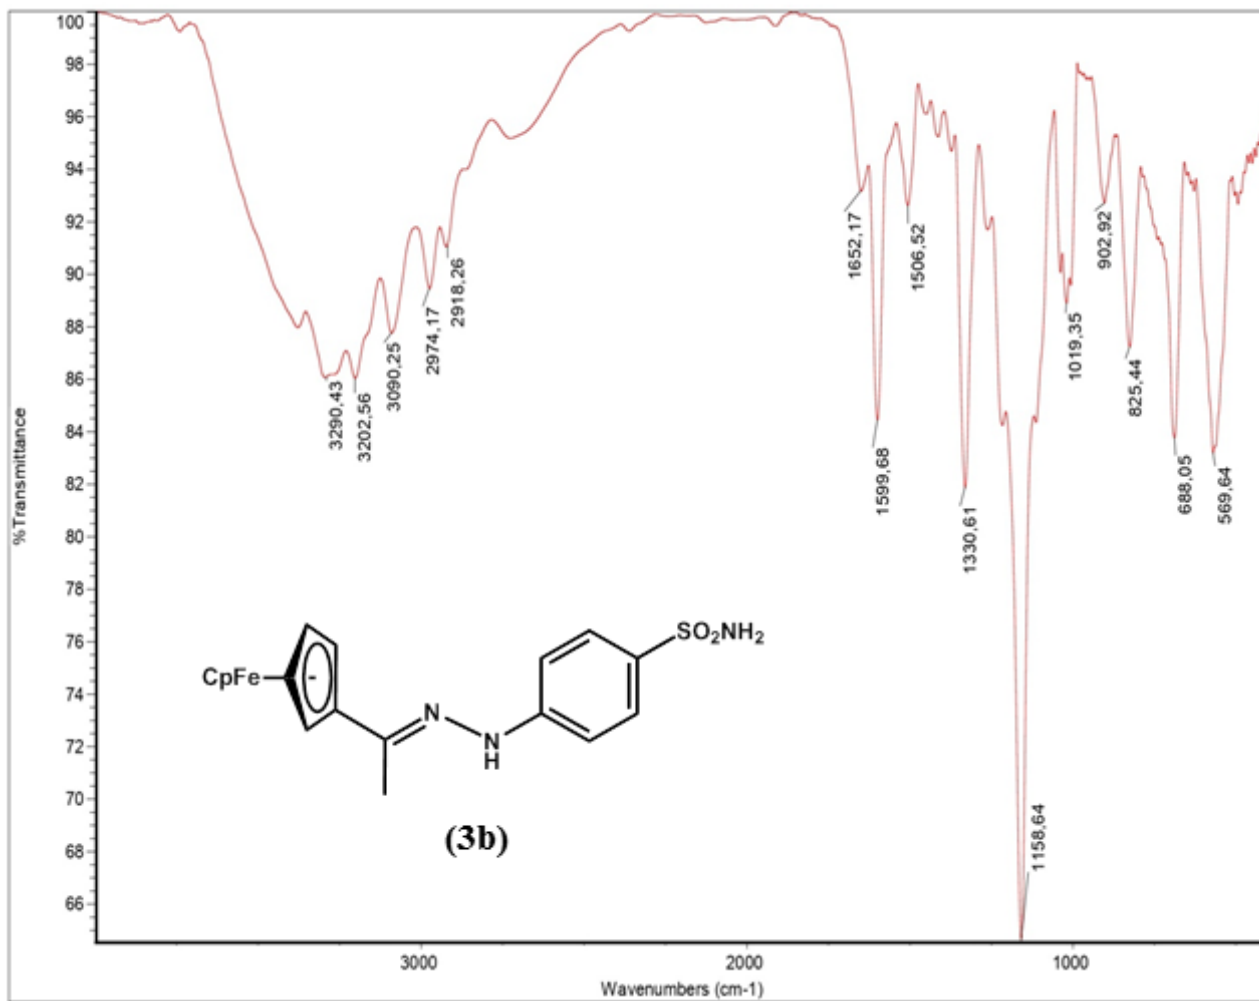

Figure S3. FT-IR spectrum (KBr disk) of **1a**.

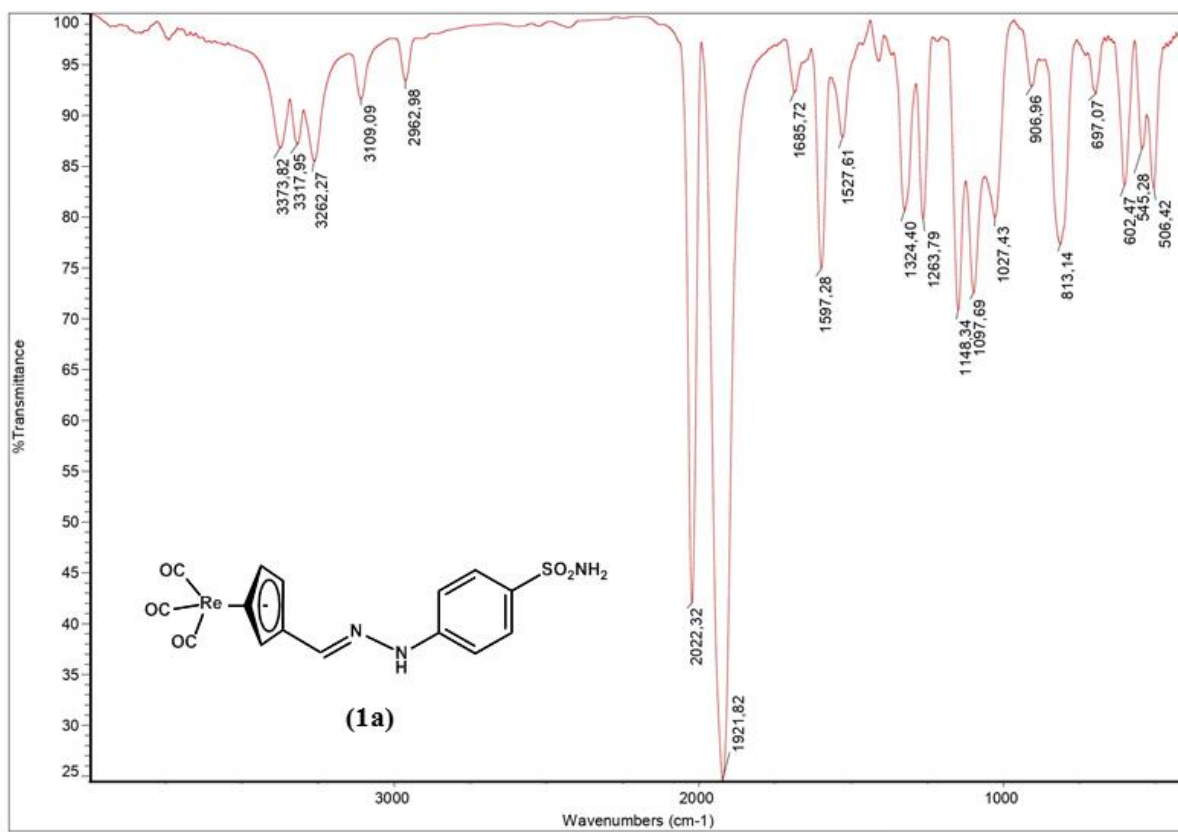

**Figure S4.** [ $^1\text{H}$ - $^{13}\text{C}$ ]-HSQC spectrum of **2a** in acetone- $\text{d}_6$  at 298 K.

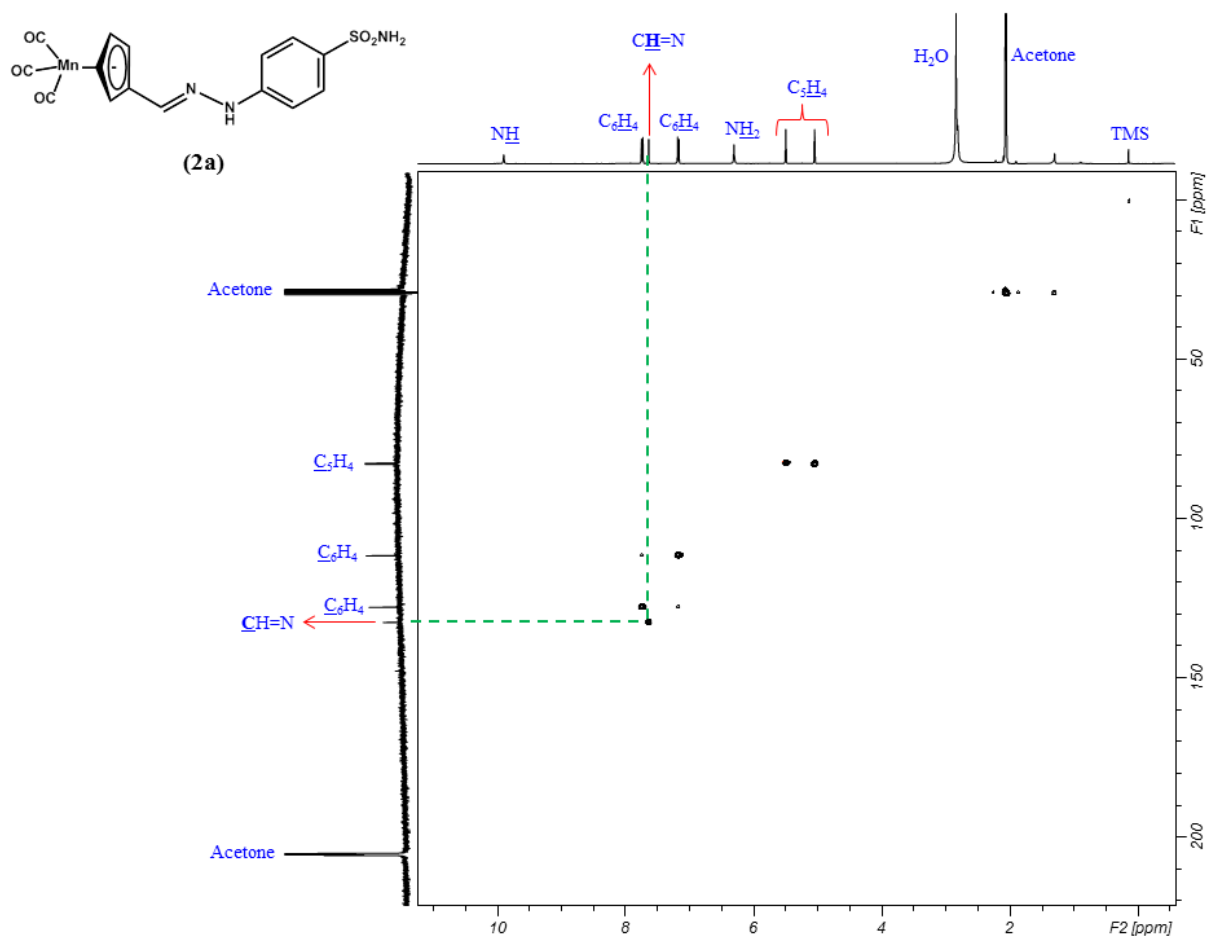

Supplement: IENZ_A_1724995_SM4433.pdf [file IENZ_A_1724995_SM4433.pdf]
